# Supplementary material for: Heavily Gd-Doped Non-Toxic Cerium Oxide Nanoparticles for MRI Labelling of Stem Cells
Source: MDPI journal article supplement (doi:10.3390/molecules28031165), 2023-01-24
Supplement: s1 [file s1]

# Heavily Gd-doped non-toxic cerium oxide nanoparticles for MRI labelling of stem cells

Anton L. Popov <sup>1</sup>, Irina V. Savintseva <sup>1</sup>, Taisiya O. Kozlova <sup>2</sup>, Olga S. Ivanova <sup>2</sup>, Ivan V. Zhukov <sup>3</sup>, Alexander E. Baranchikov <sup>2</sup>, Alexandra V. Yurkovskaya <sup>3</sup>, Andrey A. Savelov <sup>3</sup>, Artem M. Ermakov <sup>1</sup>, Nelli R. Popova <sup>1</sup>, **Konstantin L. Ivanov** <sup>3</sup> and Vladimir K. Ivanov <sup>1,2\*</sup>

<sup>1</sup> Institute of Theoretical and Experimental Biophysics of the Russian Academy of Sciences, 3 Institutskaya st., Pushchino 142290, Russia

<sup>2</sup> Kurnakov Institute of General and Inorganic Chemistry of the Russian Academy of Sciences, 31 Leninskiy prosp., Moscow 119991, Russia

<sup>3</sup> International Tomography Center, Siberian Branch of the Russian Academy of Sciences, 3A Institutskaya st., Novosibirsk 630090, Russia

\* Correspondence: van@igic.ras.ru

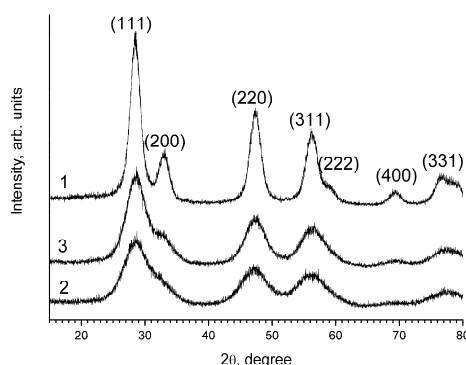

**Figure S1.** XRD patterns of gadolinia-doped ceria synthesised using different protocols. 1 – Sample 1; 2 – Sample 2; 3 – Sample 3.

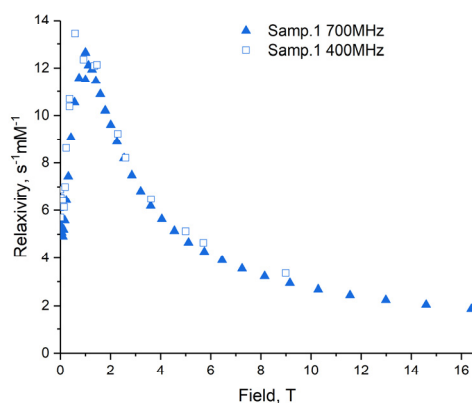

**Figure S2.** Comparison of the relaxivity field dependencies for Sample 1, measured in two independent series of experiments, the first one using a 400 MHz field cycling setup (open squares), and then, two weeks later, the second one using a 700 MHz field cycling setup (solid triangles). The data are in very good agreement with each other, confirming the stability of the sample and the correctness of the chosen experimental approach.

**Table S1.** Selected gene groups for RT-PCR analysis.

|                                                            | Gene # | Gene Symbol |
|------------------------------------------------------------|--------|-------------|
| Glutathione Peroxidases (GPx)                              | A01    | GPX1        |
|                                                            | A02    | GPX2        |
|                                                            | A03    | GPX3        |
|                                                            | A04    | GPX4        |
|                                                            | A05    | GPX5        |
|                                                            | A06    | GSTP1       |
|                                                            | A07    | GSTZ1       |
| Peroxiredoxins (TPx)                                       | A08    | PRDX1       |
|                                                            | A09    | PRDX2       |
|                                                            | A10    | PRDX3       |
|                                                            | A11    | PRDX4       |
|                                                            | A12    | PRDX5       |
|                                                            | B01    | PRDX6       |
| Other Peroxidases                                          | B02    | CAT         |
|                                                            | B03    | CYBB        |
|                                                            | B04    | CYGB        |
|                                                            | B05    | DUOX1       |
|                                                            | B06    | DUOX2       |
|                                                            | B07    | LPO         |
|                                                            | B08    | MPO         |
|                                                            | B09    | PTGS1       |
|                                                            | B10    | PTGS2       |
| Other Antioxidants                                         | B11    | ALB         |
|                                                            | B12    | APOE        |
|                                                            | C01    | GSR         |
|                                                            | C02    | MT3         |
|                                                            | C03    | SRXN1       |
|                                                            | C04    | SOD1        |
|                                                            | C05    | SOD2        |
|                                                            | C06    | SOD3        |
| Genes Involved in Reactive Oxygen Species (ROS) Metabolism | C07    | ALOX12      |
|                                                            | C08    | NOS2        |
|                                                            | C09    | NOX4        |
|                                                            | C10    | NOX5        |
|                                                            | C11    | UCP2        |
|                                                            | C12    | AOX1        |
|                                                            | D01    | BNIP3       |
|                                                            | D02    | EPHX2       |
|                                                            | D03    | MPV17       |
|                                                            | D04    | ATOX1       |
|                                                            | D05    | CCL5        |
|                                                            | D06    | DHCR24      |
|                                                            | D07    | FOXN1       |
|                                                            | D08    | FTH1        |
|                                                            | D09    | GCLM        |
|                                                            | D10    | GSS         |
|                                                            | D11    | HMOX1       |
|                                                            | D12    | HSPA1A      |
|                                                            | E01    | MBL2        |
|                                                            | E02    | NQO1        |
|                                                            | E03    | RNF7        |
|                                                            | E04    | SIRT2       |
|                                                            | E05    | SQSTM1      |
|                                                            | E06    | AKR1C2      |
|                                                            | E07    | BAG2        |
|                                                            | E08    | FHL2        |
| Pathway Activity Signature Genes                           | E09    | GLA         |
|                                                            | E10    | HSP90AA1    |
|                                                            | E11    | LHPP        |
|                                                            | E12    | TRAPPC6A    |
| Mitochondrial Dysfunction                                  | F01    | MRPL43      |
|                                                            | F02    | NDUFB11     |
|                                                            | F03    | POLRMT      |
|                                                            | F04    | SIRT1       |
|                                                            | F05    | SIRT3       |
|                                                            | F07    | TFAM        |
|                                                            | F08    | TFB1M       |
|                                                            | F09    | TFB2M       |
|                                                            | F10    | CCS         |
|                                                            | F11    | SELENOS     |
|                                                            | F12    | NOS2        |
| Anti Apoptotic                                             | G01    | BCL2        |
|                                                            | G02    | BIRC3       |
|                                                            | G03    | MCL1        |
|                                                            | G04    | TRAF2       |
| Autophagy                                                  | G05    | ATG3        |
|                                                            | G06    | ATG12       |
|                                                            | G07    | NFKB1       |
|                                                            | G08    | RPS6KB1     |
| Necrosis                                                   | G09    | CCDC103     |
|                                                            | G10    | FOXI1       |
|                                                            | G11    | JPH3        |
|                                                            | G12    | RAB25       |
| Pro apoptotic                                              | H01    | BAX         |
|                                                            | H02    | CD40        |
|                                                            | H03    | CFLAR       |
|                                                            | H04    | FAS         |
|                                                            | H05    | TNFRSF10A   |
